# Supplementary material
Source: PubMed Central journal article supplement (PMC5733605)
Supplement: 10.1074_M117.797001_jbc.M117.797001-1.pdf [file 10.1074_M117.797001_jbc.M117.797001-1.pdf]

## **Epigenetic Modification of miR-663 Regulates Mitochondria-to-Nucleus Retrograde Signaling and Tumor Progression.**

Trevor Carden<sup>1</sup>, Bhupendra Singh<sup>1</sup>, Ved Mooga<sup>1</sup>, Prachi Bajpai and Keshav K Singh<sup>1,2,3,4</sup>

Departments of Genetics<sup>1</sup>, Pathology<sup>2</sup>, Environmental Health<sup>2</sup>, Center for Free Radical Biology<sup>2</sup>, Center for Aging<sup>2</sup> and UAB Comprehensive Cancer Center<sup>2</sup>, University of Alabama at Birmingham, Birmingham, Alabama and Birmingham Veterans Affairs Medical Center<sup>3</sup>, Birmingham, Alabama, 35294, USA

### **Supplemental Contents**

Table S1: List of PCR primers

Figure S1: Expression of DNA Methylases and Demethylases in Breast Tumors

Figure S2: Stable Over-expression and Knockdown of miR-663 in Breast Cancer Cell Lines

Figure S3: miR-663 Does Not Localize to Mitochondria

Figure S4: Confirmation of Gene Dysruption by CRISPRs

**Table S1**  
**List of PCR primers**

| GENE           | FORWARD                 | REVERSE                |
|----------------|-------------------------|------------------------|
| NDUFB8         | TGTATGCAGCTCTTCGGTTTC   | CTGGTCTTTGGAGGGATCAC   |
| SDHA           | CCCTCCAATTAACCAAACGC    | CAGGTGCTTTAGGTCTCCATAG |
| SDHB           | TTGACTCTACTTTGACCTTCCG  | TCCAGTTTCTCACGCTCTTC   |
| SDHC           | ATGGAGCGGTTCTGGAATAAG   | ATGAGAGGGGAAGACAAGTGC  |
| SDHD           | TGGGAATTGTCGCTAAGTG     | AAACTGACAACCCTCTCG     |
| UQCRC1         | AATGGGGCAGGCTACTTTTT    | GGTCAAGTCTGCACGAGACA   |
| UQCRC2         | CAAAGTTGCCCCAAACTTA     | AGCCATGTTTTCCCTTGTTG   |
| UQCRQ          | AGTGCAGTGGTGTGATCTCG    | CTGTGCCCATTTCTCATCT    |
| UQCRFS1        | GGCAACGGCAGTAATAACCA    | CCCACACAGACATCAAGGTG   |
| UCRC           | CTTCAAAGCCCTCTGCAAC     | GCCCAAGACAATTCTTCAA    |
| UQCRB          | TTCTCTGTTGCGGATGTGAC    | GCTGCATCCACAGACTTCAA   |
| UQCRH          | ACTGGAGGACGAGCAAAAGA    | TGATGCCCAGATGATGAAGA   |
| CYC1           | CCAAAACCATACCCCAACAG    | TATGCCAGCTTCCGACTCTT   |
| CYTB           | TGAAACTTCGGCTCACTCCT    | AATGTATGGGATGGCGGATA   |
| COX5A          | AACAAGCCAGATATAGATGCC   | TGCTTTGCTTAACAACCT     |
| COX4L1         | CTTAATGCGATACAACCTCGAC  | CTCATGAAAGTGTGTAAGAG   |
| COX6A1         | ACCATACTCTATTCCATAACCC  | TTTATTTAAGCCATCTCCTGCC |
| COX7C          | CATTCATCTGTCCTCATTCTC   | AAATGGCAAATTCTTCCCAG   |
| NDUFAF1        | GCAGGAGGTCAAGATTCCTTT   | CTTGGGTTAAGCTCTGGAGAAT |
| SDHAF1         | AGACTAGCTTGACGAATTGGG   | GAGCCAGAAGTGGGTATGTT   |
| SDHAF2         | GTGTCTACAGTGTCTCGACTTC  | CTCGTTAATCAGGCGGTCATAG |
| UQCC1          | GCTGGTAGAGTATGTGAGGAAAC | TCGTTGTAAGTCGGAGAATGG  |
| UQCC2          | GAGAATACCCAGGTTGCAGAG   | TCAGCTTGTACTTCCAACG    |
| TTC19          | GCCAACTTAGCATTTATACGGG  | GGCCAGCTTTAGGGAAATTC   |
| SCO1           | GGAATGAAGCACGTCAAGAAAG  | TCCTTGTCAGTTTTACGCTCC  |
| PTCD2          | GACATGTGTTCTCGGAGGAAG   | GCACAGCATCCAAAGAATCAG  |
| JunB           | ACGACTACAACTCCTGAAACC   | GAGCCCTGACCAGAAAAGTAG  |
| TGF $\beta$ 1  | GTCTACACAGTCTTTGCTCCC   | CCTCCGCTAACCAGGATTC    |
| $\beta$ -Actin | CTGGAACGGTGAAGGTGACA    | AAGGGACTTCCTGTAACAATG  |

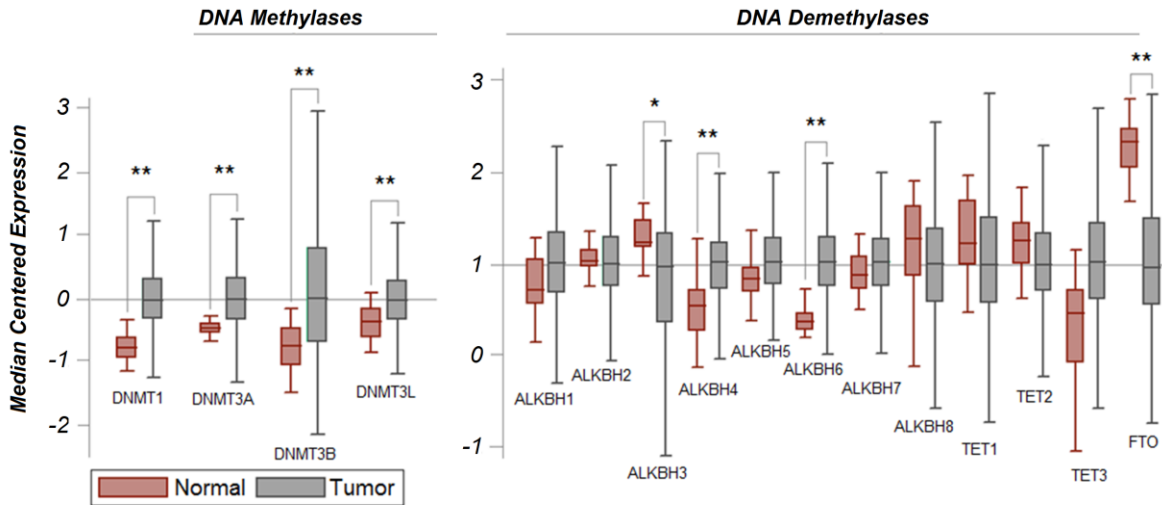

**Figure S1**

**Expression of DNA Methylases and Demethylases in Breast Tumors**

Median-centered expression data from TCGA breast samples (n=22 normal and 522 tumor) for four DNA methylases (left panel) and 12 DNA demethylases (right panel). \*p<0.05, \*\*p<0.01, \*\*\*p<0.001

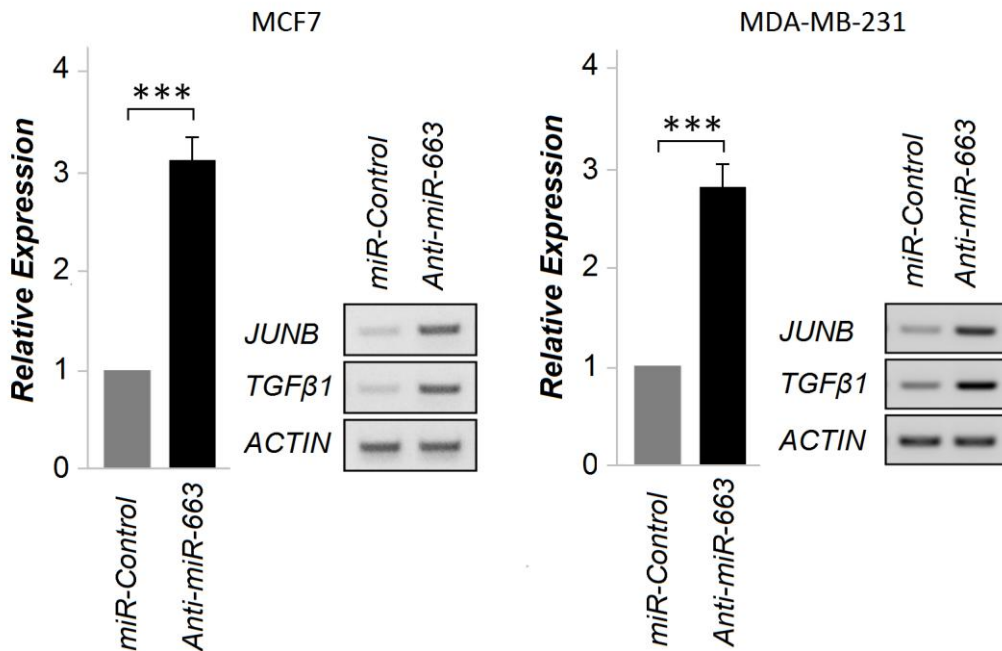

**Figure S2**

**Stable Over-expression and Knockdown of miR-663 in Breast Cancer Cell Lines**

A) Expression of the miR-663 primary transcript in MCF7 breast cancer cells stably expressing a pre-miR-663 expression plasmid (left side). Increased RNA Expression of TGFβ1 and JunB, two known target genes of miR-663, demonstrates inhibition of miR-663 by the anti-miR-663 construct (Right side). B) Expression of the miR-663 primary transcript in MDA-MB-231 breast cancer cells stably expressing pre-miR-663 (left side). Increased RNA Expression of TGFβ1 and JunB demonstrates inhibition of miR-663 (Right side). \*\*\*p<0.001. Real-Time PCR data represent three biological replicates and error bars denote standard deviation. Semi-quantitative PCRs are representative of two biological replicates.

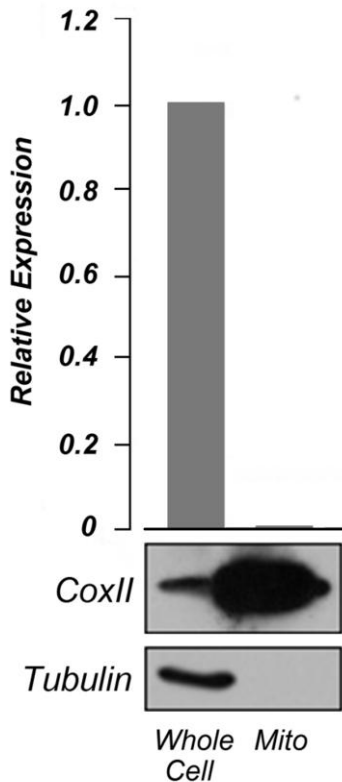**Figure S3****miR-663 Does Not Localize to Mitochondria**

Real Time PCR of mature miR-663 in MCF7 mitochondria. Crude mitochondria were isolated from MCF7 cells and purified on a sucrose gradient. cDNA was prepared from RNA of the purified mitochondria.

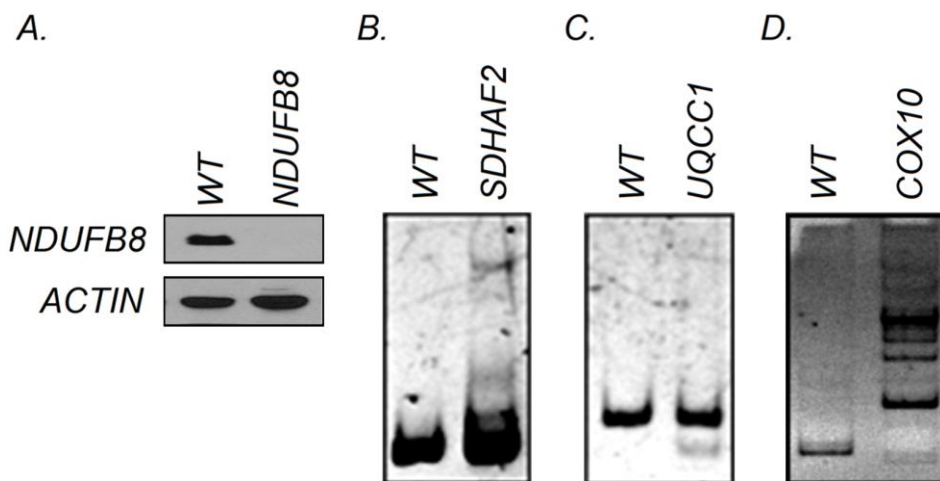**Figure S4****Confirmation of Gene Dysruption by CRISPRs**

A) Western blot was used to assess disruption of NDUFB8 in MCF7 WT cells transfected with a CRISPR targeting NDUFB8. Heteroduplex Mobility Assays were used to assess gene disruption of MCF7 cells transfected with CRISPRs against B) SDHAF2 C) UQCC1 and D) COX10.
